# Supplementary material
Source: PubMed Central journal article supplement (PMC2746402)
Supplement: NIHMS123172-supplement-1_si_001.pdf [file NIHMS123172-supplement-1_si_001.pdf]

## **Supporting Information**

MANUSCRIPT TITLE: A field, laboratory and modeling study of reactive transport of groundwater arsenic in a coastal aquifer

AUTHOR NAMES: Hun Bok Jung<sup>1</sup>, Matthew A. Charette<sup>2</sup>, Yan Zheng<sup>1, 3</sup>

AUTHOR ADDRESSES: <sup>1</sup>School of Earth and Environmental Sciences, Queens College and the Graduate School and University Center, The City University of New York, Flushing, NY 11367 United States; <sup>2</sup>Department of Marine Chemistry and Geochemistry, Woods Hole Oceanographic Institution, Woods Hole, MA 02543 United States; <sup>3</sup>Lamont-Doherty Earth Observatory of Columbia University, Palisades, NY 10964 United States

NAME OF JOURNAL: Environmental Science and Technology

NUMBER OF PAGES: 19

NUMBER OF TABLES: 5

NUMBER OF FIGURES: 4

We describe sampling and analysis methods (sections 1, 2 and 3), hydrologic and chemical settings and parameters used in the multi-component reactive transport model PHT3D to simulate As transport at the Waquiot Bay coastal aquifer (section 4). Additional modeling results of PHT3D that illustrate pH and As speciation in simulations and sensitivity tests are reported (section 5). PHT3D is also used to estimate  $K_d$  from an As(V) injection experiment performed in the Cape Cod aquifer (Höhn et al., 2006) studied by USGS (section 6).

### *1. Water sampling and Analysis of As and Fe*

Pore water samples were collected using a stainless steel drive point piezometer system (“Retract-A-Tip”, AMS Inc) (Charette and Allen, 2006). Samples were obtained between approximately 1 m and 7 m at PZ10, 1 m and 4 m at PZ6, and 1 and 8 m depth at PZ3 with 0.3-0.45 m depth resolution for the fresh groundwater portion and 0.6 m depth resolution for the saline groundwater portion (Table S1). Groundwater samples were drawn to the surface through acid-cleansed nylon tubing using a peristaltic pump at a flow rate of  $500 \text{ ml min}^{-1}$ . After a minimum 3-fold flushing the tubing volume and stabilization of the reading of the oxidation reduction potential (ORP), pH, dissolved oxygen, and temperature that were measured using a YSI 600XLM in a flow through cell (YSI Inc), samples filtered through an inline  $0.45 \text{ }\mu\text{m}$  Pall AquaPrep 600 filter were collected in 20 mL acid-cleaned high-density polyethylene (HDPE) liquid scintillation vials (Wheaton Science). Immediately after sample collection without acidification in the field, dissolved Fe(II) was measured by a ferrozine colorimetry method (Stookey, 1970). As(III) was measured by differential pulse cathodic stripping voltammetry (DPCSV) with a detection limit of  $\sim 0.2 \text{ }\mu\text{g L}^{-1}$  (He et al., 2004). An Eco Chemie  $\mu$ Autolab voltammetric apparatus (Brinkmann Instruments, Westbury, NY) equipped with a Metrohm 663VA electrode stand and controlled by a laptop computer running ECO Chemie GPES 4.95 software. Then, samples were acidified to 1% HCl (Optima, Fisher). Dissolved As and Fe concentrations were determined by HR ICP-MS that has a detection limit of  $0.1 \text{ }\mu\text{g L}^{-1}$  for As and  $0.4 \text{ }\mu\text{g L}^{-1}$  for Fe (Cheng et al., 2004).

Bay water sample was collected in a 20mL scintillation vial about 5 m away from the shoreline, and was acidified to 1% HCl after filtration through a  $0.45 \text{ }\mu\text{m}$  syringe filter.

Total As in the bay water was determined by DPCSV after reducing all inorganic As(III+V) to As(III) with 20mM L-cysteine (He et al., 2007).

## *2. Sediment sampling and Analysis of As and Fe*

Sediment samples were placed in an anaerobic glove bag filled with ultra pure N<sub>2</sub> gas in the field immediately after sample collection (Table S2). Within hours of sample collection, 5 to 10 g of samples with a 0.3 m depth resolution were leached with 7 mL of 1.2N HCl in 15 mL centrifuge tube (BD Falcon) at 80 °C for 1hr to liberate elements associated with amorphous and labile crystalline Fe oxyhydroxides phases (Horneman et al, 2004). Total Fe and Fe(II) in the leachates were determined by a colorimetric technique using ferrozine solution in the field (Stookey, 1970; Horneman et al., 2004). To evaluate As sorbed on the sediment surface, sediments were extracted by a N<sub>2</sub>-purged 1M sodium phosphate (Fisher) solution containing 0.1 M ascorbic acid for 36hrs in 15mL crimp sealed amber vials under anaerobic condition. Concentrations of As(III) in the phosphate extract were determined by DPCSV in the field, while total As concentrations were determined by HR ICP-MS in the laboratory (Jung and Zheng, 2006). The sediment HCl leachates were also analyzed by HR ICP-MS similarly for As.

## *3. Analytical Methods for dissolved and sedimentary As*

For DPCSV analysis of As(III), stock standard solution of 1000 mg L<sup>-1</sup> As(III) was prepared by dissolving sodium *m*-arsenite (NaAsO<sub>2</sub>) in nano-pure water (>18 MΩ) containing 1 g L<sup>-1</sup> ascorbic acid, which was added to prevent oxidation of arsenite (He et al., 2004). Concentration of dissolved As(III) in the filtered and acidified supernatant was determined by DPCSV while total dissolved As by HR ICP-MS (Cheng et al., 2004). Sediment samples after equilibration with As(III) for adsorption experiment were sequentially extracted by 1M sodium phosphate for 36 hrs and then by 1.2N hot HCl for 1 hr. The As(III) in the phosphate leachate was determined by DPCSV. Total As in both the phosphate and HCl leachates, was determined by HR ICP-MS.

## *4. Detailed hydrologic and chemical settings for PHT3D modeling*

The aquifer bulk density was set to  $1.875 \text{ g cm}^{-3}$  based on the aquifer porosity of 0.35 and the density of dry sand of  $2.65 \text{ g cm}^{-3}$  (Michael et al., 2005). For the upland side, constant head boundary condition was selected, while for the Waquoit Bay side, river boundary condition was selected to allow the fresh groundwater to discharge towards the bay, and all other sides were no flow boundaries. At the river boundary, the thickness of the riverbed, the hydraulic conductivity of the riverbed, and the width of river were assigned to be 0.5 m,  $8.64 \text{ m d}^{-1}$  and 10 m, respectively, which is consistent with Michael et al (2005) showing that hydraulic conductivity is similar for aquifer sediment and bay sediment, and most fresh groundwater discharges within ~10 m distance from the shore. Shore normal freshwater flux of  $0.484 \text{ m}^3 \text{ d}^{-1}$  simulated by PHT3D is within the range of  $0.142\text{--}1.558 \text{ m}^3 \text{ d}^{-1}$  of fresh water flux measured by seepage meters along 60-150 m of shoreline (Michael et al., 2003), and comparable to the hydrogeologic estimate of  $1.234 \text{ m}^3 \text{ d}^{-1}$  in front of the low lying areas along 210 m of shoreline, which includes our study site (Mulligan and Charette, 2006).

To simulate the transport of As along the flow path, the fresh groundwater enters the model from the upland boundary and flow towards the bayside boundary. The composition of upland groundwater enters the boundary is simplified to capture the conditions commonly observed, with  $500 \text{ }\mu\text{M}$  of Na and Cl,  $300 \text{ }\mu\text{M}$  of Ca and  $600 \text{ }\mu\text{M}$  of  $\text{HCO}_3$  (Stollenwerk, 1995; Höhn et al., 2006). Three 2-m intervals are specified, with an anoxic zone ( $\text{pH} = 7$ ) and two oxic zones with DO of  $3 \text{ mg L}^{-1}$  above and below ( $\text{pH} = 6$ ). The oxic groundwater contains no dissolved Fe(II) and As(III). The reducing groundwater contains  $5.6 \text{ mg L}^{-1}$  of Fe(II) and  $15 \text{ }\mu\text{g L}^{-1}$  of As(III). The recharging fresh water ( $\text{pH} = 6$ ) with  $10 \text{ mg L}^{-1}$  of  $\text{O}_2$  contains  $500 \text{ }\mu\text{M}$  of Na and Cl for charge balance. The recharging saline water ( $\text{pH} = 8$ ) near shore has  $10 \text{ mg L}^{-1}$  of  $\text{O}_2$ , and  $5 \text{ mM}$  of Na and Cl.

For the parametric K<sub>d</sub>-based reactions in PHT3D, four K<sub>d</sub> values of 25, 60, 90 and  $120 \text{ L kg}^{-1}$  representing 4 horizontal redox zones along the flow path towards the bay were parameterized. The K<sub>d</sub> values were estimated based on the sedimentary Fe(II)/Fe of 0.8, 0.6, 0.4 and 0.2 that capture the increasing average percentage of Fe(III) in the sediment cores toward the bay using an empirical relationship derived from batch adsorption experiment:

$$K_d (\text{L kg}^{-1}) = -164 \times \text{Sed Fe(II)/Fe} + 155 (R^2 = 0.999)$$

To establish this empirical relationship, three  $K_d$  values were first calculated from three experimentally determined Langmuir isotherms (Fig. 2) at equilibrium with dissolved As concentration measured at each field site. Then a linear regression was performed.

For the SCM based reactions in PHT3D, surface site density of 1.1, 1.5, 3.0, and 4.0  $\mu\text{M g}^{-1}$  representing 4 horizontal redox zones along the flow path towards the bay were parameterized. These values were chosen in part due to the SCM model fit to sorption experimental data generated reasonable results using a set of values similar to these (Fig. 2). In addition, previous studies of surface properties of reducing sediment from the Cape Cod aquifer extensively evaluated by USGS were considered. Surface site density for unsaturated aquifer sediment in USGS research site on Cape Cod is reported to be 1.1~1.2  $\mu\text{M g}^{-1}$  by potentiometric titration of sediment with  $\text{H}^+$  (Stollenwerk, 1995) and by calculation based on specific surface area (Kent et al., 1995). Because the selectively leached poorly crystalline hydrous Fe oxide (95 mg/kg Fe) in the aquifer sediment from USGS site (Kent et al., 1995) is comparable to the average HCl leachable Fe oxide concentration (80 mg/kg FeIII) in the reducing sediment at our site, the value of 1.1  $\mu\text{M g}^{-1}$  is adopted to represent reducing sediment here. The surface site density and conditional equilibrium constants, the same as the diffuse layer model (DLM) of ferrihydrite (Dzombak and Morel, 1990), were defined in a subcode (postfix.phrq) for surface complexation reactions in PHT3D.

##### 5. Simulation by PHT3D and sensitivity test

pH. The simulated pH captures both the vertical and horizontal gradients in the field data. Like dissolved Fe (Fig. 3), simulated pH quickly reaches steady state in ~ 20 years with values of ~ 6.7 in the top and bottom layers. Along the plume, pH averages ~7.5, and is ~8.1, ~7.8, and ~6.7 at PZ10, PZ6, and PZ3, respectively. The simulated pH is comparable to the field observation at PZ6 and PZ3, but is higher than field observed value of ~7.2 at PZ10. Although the pH in the center of plume at PZ10 is overpredicted, it is not likely to affect the transport of dissolved As because adsorption of As(III) by Fe oxides is not sensitive to pH when pH is 6-9 (Dixit and Hering, 2003).

*As speciation.* In the PHT3D simulation, the speciation of dissolved As is determined by oxidation of As(III) by dissolved oxygen. Therefore, the simulated As speciation in the center of reducing plume, is nearly 100% As(III) at PZ10 and PZ6 due to absence of dissolved oxygen, and is almost ~100% As(V) at PZ3 due to abundant oxygen supplied from the surface. The field data show dominance of As(V) at PZ6. This may be attributed to absence of Mn oxide in the model, which could oxidize dissolved As(III) at PZ6 in the field (Amirbahman et al., 2006). Nevertheless, this inconsistency in As speciation would cause a minor effect on the As transport because As(III) and As(V) have a similar affinity for Fe oxides at near-neutral pH conditions (Dixit and Hering, 2003).

*Sensitivity test.* PHT3D was run with three hydraulic gradients, 0.004, 0.009 and 0.020, and the effect on Fe-oxides precipitation was tested. The values were chosen because hydraulic gradient across the head of Waquoit Bay varies from 0.004 to 0.022 at high tide and from 0.002 to 0.015 at low tide (Mulligan and Charette, 2006).

PHT3D was also run with variable recharge rate scenarios to test the effect on Fe-oxides precipitation. The default setting reported in the text is as follows. A recharge rate for Zones 1 and 2 is  $0.001 \text{ m d}^{-1}$ , representing the average recharge rate to the aquifer (Michael et al., 2005),  $0.005 \text{ m d}^{-1}$  for Zone 3, and  $0.01$  and  $0.05 \text{ m d}^{-1}$  in first and second half of Zone 4 (Fig. 3) to reflect the tidal infiltration and near-shore circulation due to tides and waves. To examine the model sensitivity to tide or waves near shore, the recharge rate was varied by a factor 4 in Zones 3 and 4, increasing the recharge rate from  $0.002$  to  $0.005$  and  $0.010 \text{ m d}^{-1}$  in Zone 3, while from  $0.005$  to  $0.01$  and  $0.02 \text{ m d}^{-1}$  in the first half of Zone 4 and from  $0.025$  to  $0.05$  and  $0.1 \text{ m d}^{-1}$  in the second half of Zone 4.

As the result, simulated Fe oxide precipitation is not sensitive to a factor of 4~5 variation of hydraulic gradient and recharge rate showing the variation of < 10%. Furthermore, simulated As concentration is not affected by simulated Fe oxide precipitation because As adsorption in PHT3D simulation is controlled by spatially assigned surface site densities using a subcode (postfix.phrq).

#### *6. Simulation of an As(V) injection experiment by PHT3D*

To further establish that the reducing sediment from the USGS study site in the upgradient region of the Cape Cod aquifer has surface properties similar to those in the

reducing zones at Waquiot Bay, a Kd-based PHT3D was used to simulate the migration of an injected arsenate plume. Höhn et al (2006) injected groundwater pumped from the suboxic zone amended with 6.7  $\mu\text{M}$  As(V) continuously at a rate of  $\sim 25 \text{ L h}^{-1}$  into the anoxic iron reducing zone of the aquifer for 4 weeks. The injected As(V) plume was monitored at 10 wells down gradient for 104 days. Injected As(V) was observed to be reduced to As(III) after approximately 1 week after terminating the injection, and the plume migrated  $\sim 4.5 \text{ m}$  down gradient at the end of the observational period. Applying the same hydrological and geochemical parameters reported in Höhn et al (2006), the observed migration of As(III) and As(V) plumes can be simulated using PHT3D (Fig. S3) when a Kd value of  $4 \text{ L kg}^{-1}$  is used for a final median equilibrated [As] of  $\sim 75 \mu\text{g L}^{-1}$  in the plume. This is equivalent to a Kd value of 30 for an equilibrated [As] of  $10 \mu\text{g L}^{-1}$ , assuming the same Langmuir sorption isotherm for the reducing sediments as dark gray sediment at PZ7 (Table 1, Fig. S4). Unlike Höhn et al (2006)'s experiment showing gradual reduction of As(V) to As(III) in the plume after termination of As(V) injection and reestablishment of reducing condition, resulting in  $\sim 30\%$  of dissolved As in the form of As(V) in  $\sim 100$  days, PHT3D modeling simulated more rapid and complete reduction of As(V) to As(III) in the plume immediately after As(V) injection was terminated, resulting in  $> 99\%$  of dissolved As in the form of As(III) in  $\sim 100$  days.

## *References*

- Amirbahman, A.; Kent, D.B.; Curtis, G.P.; Davis, J.A. Kinetics of sorption and abiotic oxidation of arsenic(III) by aquifer materials. *Geochim. Cosmochim. Acta* 2006, 70, 533-547.
- Baes, C.F.; Sharp, R.D. A Proposal for Estimation of Soil Leaching and Leaching Constants for Use in Assessment Models. *J. Environ. Qual.* 1983, 12, 17–28.
- BGS & DPHE. In: Kinniburgh, D.G., Smedley, P.L. (Eds.), *Arsenic Contamination of Groundwater in Bangladesh*, British Geological Survey WC/00/19, Keyworth, UK, 2001.
- Charette, M.A.; Allen, M.C. Precision Ground Water Sampling in Coastal Aquifers Using a Direct-Push, Shielded-Screen Well-Point System. *Ground Water Monitoring & Remediation* 2006, 26, 87-93.
- Cheng, Z.; Zheng, Y.; Mortlock, R.; van Geen, A. Rapid multi-element analysis of groundwater by high-resolution inductively coupled plasma mass spectrometry. *Anal. Bioanal. Chem.* 2004, 379, 512-528.
- DPHE/BGS/MML. *Groundwater studies for arsenic contamination in Bangladesh, Main Report, Phase 1: Rapid investigation phase*. Department of Public Health Engineering (DPHE), Government of Bangladesh, British Geological Survey, UK and Mott MacDonald Ltd., Dhaka, Bangladesh, 1999.
- Dixit, S.; Hering, J.G. Comparison of Arsenic (V) and Arsenic (III) Sorption onto Iron Oxide Minerals: Implication for Arsenic Mobility. *Environ. Sci. Technol.* 2003, 37, 4182-4189.
- Dzombak, D.A.; Morel, F.M.M. *Surface Complexation Modeling: Hydrous Ferric Oxide*. Wiley-Interscience, New York, 1990.
- He, Y.; Zheng, Y.; Locke, D.C. Cathodic stripping voltammetric analysis of arsenic species in environmental water samples. *Microchem. J.* 2007, 85, 265-269.
- He, Y.; Zheng, Y.; Ramnaraine, M.; Locke, D.C. Differential pulse cathodic stripping voltammetric speciation of trace level inorganic arsenic compounds in natural water samples. *Anal. Chim. Acta* 2004, 511, 55-61.
- Höhn R.; Isenbeck-Schröter, M.; Kent, D.B.; Davis, J.A.; Jakobsen, R.; Jann, S.; Niedan, V.; Scholz, C.; Stadler, S.; Tretner, A. Tracer test with As(V) under variable redox



- conditions controlling arsenic transport in the presence of elevated ferrous iron concentrations. *J. Contam. Hydrol.* 2006, 88, 36-54.
- Horneman, A.; van Geen, A.; Kent, D.V.; Mathe, P.E.; Zheng, Y.; Dhar, R.K.; O'Connell, S.; Hoque, M.A.; Aziz, Z.; Shamsudduha, M.; Seddique, A.A.; Ahmed, K.M. Decoupling of As and Fe release to Bangladesh groundwater under reducing conditions. Part 1: Evidence from sediment profiles. *Geochim. Cosmochim. Acta* 2004, 68, 3459-3473
- Kent, D.B.; Davis, J.A.; Anderson, L.C.D.; Rea, B.A. Transport of chromium and selenium in a pristine sand and gravel aquifer: Role of adsorption processes. *Wat. Resour. Res.* 1995, 31, 1041-1050.
- Kuhlmeier, P.D. Sorption and desorption of arsenic from sandy soils: column studies. *J. Soil Contam.* 1997, 6, 21-36.
- Jung, H.B.; Zheng, Y. Enhanced recovery of arsenite sorbed onto synthetic oxides by L-ascorbic acid addition to phosphate solution: calibrating a sequential leaching method for the speciation analysis of arsenic in natural samples. *Wat. Res.* 2006, 40, 2168-2180.
- Manning, B.A.; Goldberg, S. Arsenic(III) and arsenic(V) adsorption on three California soils. *Soil Sci.* 1997, 162, 886-895.
- Michael, H.A.; Lubetsky, J.S.; Harvey, C.F. Characterizing submarine groundwater discharge: a seepage meter study in Waquoit Bay, Massachusetts. *Geophys. Res. Lett.* 2003, 30, doi:10.1029/2002GL016000.
- Michael, H.; Mulligan, A.; Harvey, C. F. Seasonal Water Exchange between Aquifers and the Coastal Ocean. *Nature* 2005, 436, 1145-1149.
- Mulligan, A.E.; Charette, M.A. Intercomparison of submarine groundwater discharge estimates from a sandy unconfined aquifer. *J. Hydrol.* 2006, 327, 411-425.
- Prommer, C.; Barry, D.A.; Zheng, C. MODFLOW/MT3DMS-Based Reactive Multicomponent Transport Modeling. *Ground Water* 2003, 41, 247-257.
- Stollenwerk, K.G. Modeling the effects of variable groundwater chemistry on adsorption of molybdate. *Wat. Resour. Res.* 1995, 31, 347-357.
- Stookey, L.L. Ferrozine - A new spectrophotometric reagent for iron. *Anal. Chem.* 1970, 42, 779-781.

- Sullivan, K.A.; Aller, R.C. Diagenetic cycling of arsenic in Amazon shelf sediments. *Geochim. Cosmochim. Acta* 1996, 60, 1465-1477.
- van Geen A.; Zheng Y.; Goodbred S.; Horneman A.; Aziz Z.; Cheng Z.; Stute M.; Mailloux B.; Weinman B.; Hoque M.A.; Seddique A.A.; Hossain M.S.; Chowdhury S.H.; Ahmed K.M. Flushing history as a hydrogeological control on the regional distribution of arsenic in shallow groundwater of the Bengal Basin. *Environ. Sci. Technol.* 2008, 42, 2283-2288.
- Williams, L.E.; Barnett, M.O.; Kramer, T.A.; Melville, J.G. Adsorption and Transport of Arsenic(V) in Experimental Subsurface Systems. *J. Environ. Qual.* 2003, 32, 841-850.

**Table S1.** Pore Water Chemical Composition Data

| Piezometer No | Sample No | Depth  | pH   | Eh    | Salinity | Fe    | FeII  | As    | AsIII | P      | S      | Mn    |
|---------------|-----------|--------|------|-------|----------|-------|-------|-------|-------|--------|--------|-------|
|               |           | m      |      | mV    |          | mg/L  | mg/L  | ug/L  | ug/L  | mg/L   | mg/L   | ug/L  |
| PZ10          | WB7-1     | 0.9    | 5.62 | 180   | 0.14     | 0.027 | nd    | <0.1  | <0.2  | 0.02   | 5.64   | 17    |
|               | WB7-2     | 1.35   | 5.84 | 372   | 0.17     | 0.028 | nd    | <0.1  | <0.2  | 0.02   | 5.49   | 20    |
|               | WB7-3     | 1.8    | 5.83 | 400   | 0.38     | 0.038 | nd    | 0.1   | <0.2  | 0.04   | 4.60   | 74    |
|               | WB7-4     | 2.25   | 6.9  | 292   | 0.48     | 0.061 | 0.028 | 1.0   | nd    | 0.14   | 14.04  | 28    |
|               | WB7-5     | 2.7    | 7.18 | 154   | 0.33     | 0.461 | 0.434 | 11.9  | 10.3  | 0.12   | 10.40  | 38    |
|               | WB7-6     | 3.15   | 7.1  | 130   | 0.14     | 2.033 | 1.935 | 14.3  | 12.2  | 0.21   | 5.91   | 47    |
|               | WB7-7     | 3.6    | 6.93 | 174   | 0.07     | 0.723 | 0.853 | 2.2   | 1.3   | 0.05   | 5.26   | 21    |
|               | WB7-8     | 4.05   | 5.94 | 332   | 0.20     | 0.060 | 0.031 | <0.1  | <0.2  | 0.01   | 3.78   | 133   |
|               | WB7-9     | 4.5    | 5.74 | 392   | 0.12     | 0.035 | 0.010 | <0.1  | <0.2  | 0.02   | 6.47   | 40    |
|               | WB7-12    | 5.85   | 5.36 | 440   | 0.11     | 0.027 | nd    | 0.0   | nd    | 0.01   | 4.29   | 53    |
| WB7-14        | 6.75      | 6.34   | 366  | 1.27  | 0.018    | nd    | 0.7   | <0.2  | 0.15  | 15.98  | 77     |       |
| PZ6           | WB7-34    | 0.9    | 6.37 | 347   | 8.74     | 0.093 | 0.075 | 0.4   | <0.2  | 0.05   | 225.26 | 21    |
|               | WB7-35    | 1.2    | 6.38 | 336   | 7.33     | 0.207 | 0.248 | 0.5   | <0.2  | 0.07   | 175.02 | 30    |
|               | WB7-36    | 1.5    | 6.7  | 324   | 5.35     | 0.070 | 0.091 | 0.1   | <0.2  | 0.07   | 105.76 | 58    |
|               | WB7-37    | 2.1    | 7.63 | 157   | 0.37     | 1.385 | 1.300 | 2.4   | <0.2  | 0.10   | 11.41  | 44    |
|               | WB7-38    | 2.4    | 7.47 | 158   | 0.18     | 0.554 | 0.462 | 0.4   | <0.2  | 0.03   | 3.45   | 43    |
|               | WB7-39    | 2.7    | 7.1  | 243   | 0.27     | 0.328 | 0.332 | <0.1  | <0.2  | 0.02   | 12.02  | 61    |
|               | WB7-40    | 3      | 6.05 | 334   | 0.09     | 0.055 | 0.043 | 0.1   | <0.2  | 0.02   | 4.23   | 111   |
|               | WB7-41    | 3.45   | 5.79 | 386   | 0.19     | 0.064 | 0.054 | <0.1  | <0.2  | 0.02   | 5.22   | 149   |
|               | WB7-42    | 3.9    | 5.76 | 396   | 0.14     | 0.018 | 0.023 | <0.1  | <0.2  | 0.01   | 2.56   | 62    |
|               | PZ3       | WB7-15 | 0.9  | 6.27  | 340      | 0.10  | 0.043 | 0.026 | <0.1  | <0.2   | 0.02   | 13.48 |
| WB7-16        |           | 1.35   | 5.89 | 353   | 0.07     | 0.077 | 0.065 | <0.1  | <0.2  | 0.02   | 6.59   | 42    |
| WB7-17        |           | 1.8    | 5.68 | 382   | 0.11     | 0.061 | 0.045 | <0.1  | <0.2  | 0.02   | 5.51   | 130   |
| WB7-18        |           | 2.25   | 5.74 | 371   | 0.12     | 0.063 | 0.003 | <0.1  | nd    | 0.02   | 4.18   | 87    |
| WB7-19        |           | 2.7    | 6.13 | 374   | 0.43     | 0.018 | 0.002 | 0.2   | <0.2  | 0.05   | 10.47  | 17    |
| WB7-20        |           | 3      | 6.37 | 355   | 1.52     | 0.026 | 0.055 | 0.8   | nd    | 0.12   | 45.38  | 13    |
| WB7-22        |           | 3.15   | 6.6  | 318   | 5.47     | 0.042 | 0.014 | 1.0   | <0.2  | 0.28   | 106.40 | 29    |
| WB7-21        |           | 3.3    | 6.5  | 338   | 12.33    | 0.271 | 0.021 | 0.9   | <0.2  | 0.36   | 272.78 | 473   |
| WB7-23        |           | 3.45   | 6.68 | 322   | 17.31    | 0.046 | 0.011 | 1.3   | <0.2  | 0.42   | 431.80 | 908   |
| WB7-24        |           | 3.6    | 6.97 | 300   | 19.64    | 0.028 | 0.024 | 0.8   | <0.2  | 0.40   | 450.74 | 1159  |
| WB7-25        |           | 3.75   | 7.21 | 282   | 20.73    | 0.029 | 0.024 | 1.6   | <0.2  | 0.39   | 492.95 | 1694  |
| WB7-26        |           | 4.05   | 7.37 | 263   | 22.99    | 0.026 | 0.024 | 1.7   | <0.2  | 0.37   | 539.80 | 2450  |
| WB7-27        |           | 4.5    | 7.45 | 271   | 24.85    | 0.257 | 0.002 | 0.2   | <0.2  | 1.29   | 687.22 | 1876  |
| WB7-28        |           | 5.1    | 7.64 | 152   | 25.41    | 1.493 | 1.581 | 0.3   | 0.2   | 1.16   | 691.89 | 1384  |
| WB7-29        |           | 5.7    | 7.81 | 93    | 25.87    | 3.050 | 2.870 | 5.6   | 6.6   | 1.54   | 686.23 | 1268  |
| WB7-30        | 6.3       | 7.95   | 47   | 26.00 | 3.293    | 3.187 | 10.1  | 16.0  | 1.39  | 700.46 | 1317   |       |
| WB7-31        | 6.9       | 8.01   | 48   | 26.00 | 3.217    | 2.962 | 9.8   | 10.3  | 1.04  | 690.73 | 874    |       |
| WB7-32        | 7.5       | 8.02   | 44   | 26.00 | 3.691    | 3.501 | 9.6   | 11.3  | 2.63  | 724.28 | 586    |       |
| WB7-33        | 8.1       | 8.02   | 26   | 26.00 | 3.996    | 3.910 | 12.3  | 16.0  | 1.40  | 690.76 | 397    |       |

\*nd: not determined; Total dissolved As concentration in bay water = 0.3  $\mu\text{g L}^{-1}$ .

**Table S2. Sediment Chemistry Data**

| Piezometer No                 | Sample No | Depth<br>m | 1.2N HCl leaching |             |            |            |             | 1M P extraction |                |      |
|-------------------------------|-----------|------------|-------------------|-------------|------------|------------|-------------|-----------------|----------------|------|
|                               |           |            | FeII/Fe           | Fe<br>mg/kg | P<br>mg/kg | S<br>mg/kg | Mn<br>mg/kg | As<br>ug/kg     | AsIII<br>ug/kg |      |
| <b>PZ7</b><br><b>N = 6</b>    | H2-1      | 0.2        | 0.22              | 1040        | 57.21      | 18.63      | 27.65       | 208             | 247            |      |
|                               | H2-2      | 0.3        | 0.24              | 759         | 41.05      | 24.97      | 48.41       | 213             | 230            |      |
|                               | H2-3      | 0.5        | 0.21              | 587         | 44.15      | 25.52      | 16.87       | 286             | 301            |      |
|                               | H2-4      | 1.3        | 0.74              | 463         | 42.17      | 23.05      | 3.08        | 140             | 54             |      |
|                               | H2-5      | 1.9        | 0.91              | 536         | 79.31      | 29.45      | 5.60        | 115             | 55             |      |
|                               | H2-6      | 2.4        | 0.84              | 464         | 87.10      | 18.21      | 7.22        | 150             | 51             |      |
| <b>PZ6</b><br><b>N = 13</b>   | H1-1      | 0.6        | 0.25              | 730         | 203.89     | 63.29      | 3.24        | 387             | 197            | <0.1 |
|                               | H1-2      | 1.0        | 0.44              | 375         | 130.21     | 18.55      | 2.96        | 190             | 109            |      |
|                               | H1-3      | 1.1        | 0.46              | 354         | 77.19      | 10.02      | 2.85        | 129             | 80             | <0.1 |
|                               | H1-4      | 1.7        | 0.69              | 229         | 46.75      | 8.23       | 2.56        | 70              | 49             |      |
|                               | H1-6      | 1.8        | 0.93              | 211         | 33.44      | 8.59       | 2.21        | 107             | 28             | 1.5  |
|                               | H1-5      | 2.1        | 0.71              | 286         | 37.18      | 10.71      | 2.34        | 114             | 43             | 4.7  |
|                               | H1-7      | 2.1        | 0.68              | 404         | 38.81      | 13.34      | 3.40        | 151             | 65             | 4.1  |
|                               | H1-8      | 2.6        | 0.70              | 271         | 36.27      | 10.60      | 1.80        | 155             | 104            | 3.2  |
|                               | H1-9      | 2.9        | 0.46              | 437         | 24.95      | 13.98      | 1.99        | 92              | 127            | 1.0  |
|                               | H1-10     | 3.2        | 0.27              | 354         | 18.11      | 7.61       | 1.41        | 48              | 122            |      |
|                               | H1-11     | 3.5        | 0.36              | 252         | 17.46      | 6.59       | 1.75        | 72              | 230            | 0.3  |
|                               | H1-12     | 3.8        | 0.18              | 457         | 16.39      | 6.12       | 1.86        | 100             | 246            |      |
|                               | H1-13     | 4.2        | 0.20              | 420         | 12.45      | 7.08       | 2.06        | 98              | 202            | 0.6  |
| <b>PZ11*</b><br><b>N = 18</b> | PZ11-1    | 0.5        |                   | 840         |            |            |             | 151             | <30            |      |
|                               | PZ11-2    | 0.8        |                   | 764         |            |            |             | <30             | <30            |      |
|                               | PZ11-3    | 1.1        |                   | 1264        |            |            |             | <30             | <30            |      |
|                               | PZ11-4    | 1.6        |                   | 772         |            |            |             | 61              | <30            |      |
|                               | PZ11-5    | 1.9        |                   | 624         |            |            |             | 63              | <30            |      |
|                               | PZ11-6    | 2.4        |                   | 1306        |            |            |             | 147             | <30            |      |
|                               | PZ11-7    | 3.1        |                   | 879         |            |            |             | 62              | <30            |      |
|                               | PZ11-8    | 3.5        |                   | 653         |            |            |             | 88              | <30            |      |
|                               | PZ11-9    | 3.7        |                   | 621         |            |            |             | 78              | <30            |      |
|                               | PZ11-10   | 3.8        |                   | 740         |            |            |             | 183             | 75             |      |
|                               | PZ11-11   | 4.2        |                   | 718         |            |            |             | 124             | 101            |      |
|                               | PZ11-12   | 4.4        |                   | 580         |            |            |             | 61              | 165            |      |
|                               | PZ11-13   | 4.8        |                   | 1356        |            |            |             | 70              | <30            |      |
|                               | PZ11-14   | 5.0        |                   | 1637        |            |            |             | 73              | <30            |      |
|                               | PZ11-15   | 5.3        |                   | 1426        |            |            |             | 719             | 451            |      |
|                               | PZ11-16   | 5.6        |                   | 1417        |            |            |             | 245             | 393            |      |
|                               | PZ11-17   | 5.9        |                   | 898         |            |            |             | 597             | 315            |      |
|                               | PZ11-18   | 6.2        |                   | 702         |            |            |             | 351             | 222            |      |
| <b>PZ3</b><br><b>N = 7</b>    | H3-1      | 0.1        | 0.27              | 237         | 13.29      | 86.55      | 3.00        | 114             | 135            |      |
|                               | H3-2      | 0.3        | 0.32              | 544         | 20.24      | 29.24      | 6.10        | 115             | 146            |      |
|                               | H3-3      | 0.5        | 0.10              | 987         | 42.80      | 19.93      | 5.89        | 378             | 389            |      |
|                               | H3-4      | 0.8        | 0.11              | 749         | 46.51      | 15.06      | 2.58        | 400             | 436            |      |
|                               | H3-6      | 1.1        | 0.12              | 781         | 41.68      | 11.34      | 2.05        | 340             | 426            |      |
|                               | H3-5      | 1.5        | 0.07              | 1081        | 38.76      | 7.97       | 2.46        | 351             | 531            |      |
|                               | H3-7      | 2.1        | 0.08              | 488         | 15.97      | 6.87       | 2.13        | 94              | 272            |      |

\*PZ11 has no FeII/Fe data reported because it was not determined immediately after sampling.

**Table S3.** As speciation and concentration in supernatant and sediment of sorption experiment

| Sample No  | Initially added AsIII<br>ug/L | As in supernatant<br>after 1 week<br>ug/L | As in supernatant<br>after 2 weeks<br>ug/L | Sorbed As<br>ug/kg | Estimated sorbed As<br>by Langmuir isotherm<br>ug/kg | P-ext AsIII<br>ug/kg | P-ext AsV<br>ug/kg | HCl-ext AsT<br>ug/kg | Sorption<br>Capacity<br>ug/kg | K <sub>La</sub><br>L/ug | Kd<br>L/kg |
|------------|-------------------------------|-------------------------------------------|--------------------------------------------|--------------------|------------------------------------------------------|----------------------|--------------------|----------------------|-------------------------------|-------------------------|------------|
| <b>PZ7</b> |                               |                                           |                                            |                    |                                                      |                      |                    |                      | 1520                          | 0.038                   | 30         |
| 2-4E5      | 622                           | 10                                        | 8                                          | 367                | 361                                                  | 26                   | 298                | 145                  |                               |                         |            |
| 2-4E10     | 1176                          | 19                                        | 20                                         | 566                | 656                                                  | 32                   | 328                | 171                  |                               |                         |            |
| 2-4E15     | 1866                          | 37                                        | 33                                         | 1057               | 842                                                  | 43                   | 552                | 226                  |                               |                         |            |
| 2-4E20     | 2308                          | 68                                        | 63                                         | 1019               | 1065                                                 | 67                   | 610                | 317                  |                               |                         |            |
| <b>PZ6</b> |                               |                                           |                                            |                    |                                                      |                      |                    |                      | 1750                          | 0.067                   | 42         |
| 1-1E5      | 940                           | 8                                         | 7                                          | 578                | 582                                                  | 5                    | 385                | 219                  |                               |                         |            |
| 1-1E10     | 1880                          | 21                                        | 18                                         | 1095               | 973                                                  | 5                    | 615                | 294                  |                               |                         |            |
| 1-1E15     | 1883                          | 26                                        | 24                                         | 990                | 1082                                                 | 5                    | 772                | 326                  |                               |                         |            |
| 1-1E20     | 2254                          | 23                                        | 20                                         | 995                | 1004                                                 | 28                   | 749                | 362                  |                               |                         |            |
| <b>PZ3</b> |                               |                                           |                                            |                    |                                                      |                      |                    |                      | 4760                          | 0.029                   | 83         |
| 3-6E5      | 653                           | 23                                        | 3                                          | 403                | 403                                                  | 17                   | 619                | 237                  |                               |                         |            |
| 3-6E15     | 1847                          | 24                                        | 8                                          | 934                | 927                                                  | 75                   | 856                | 375                  |                               |                         |            |
| 3-6E20     | 2537                          | 53                                        | 15                                         | 1403               | 1412                                                 | 81                   | 1091               | 383                  |                               |                         |            |

\*Sorption capacity of 1100 ug/kg for PZ7 sediment is determined from sorption experimental data

#Sorbed As calculated by mass balance uses As concentration in supernatant after 2 weeks.

**Table S4.** Surface Complexation Reactions and equilibrium constants (log K) used in Geochemical Modeling of As(III) Sorption Isotherms (Dzombak and Morel, 1990)

| Surface reaction                                                                           | Equilibrium constant (log K) |
|--------------------------------------------------------------------------------------------|------------------------------|
| DLM-HFO/SCM                                                                                |                              |
| $\text{SOH} = \text{SO}^- + \text{H}^+$                                                    | -8.93                        |
| $\text{SOH} + \text{H}^+ = \text{SOH}^{2+}$                                                | 7.29                         |
| $\text{SOH} + \text{H}_3\text{AsO}_3 = \text{SH}_2\text{AsO}_3 + \text{H}_2\text{O}$       | 5.41                         |
| $\text{SOH} + \text{H}_3\text{AsO}_4 = \text{SH}_2\text{AsO}_4 + \text{H}_2\text{O}$       | 8.61                         |
| $\text{SOH} + \text{H}_3\text{AsO}_4 = \text{SHAsO}_4^- + \text{H}_2\text{O} + \text{H}^+$ | 2.81                         |
| $\text{SOH} + \text{H}_3\text{AsO}_4 = \text{SOHAsO}_4^{3-} + 3\text{H}^+$                 | -10.12                       |

**Table S5.** Summary of distribution coefficients (Kd) of As for variable types of soil and sediment from field investigation and laboratory experiment

| <b>Method</b>         | <b>References</b>                                 | <b>Type of sample</b>                      | <b>Kd (L/kg)</b>                                               |
|-----------------------|---------------------------------------------------|--------------------------------------------|----------------------------------------------------------------|
| Field investigation   | Baes and Sharp (1983; J of Environ Qual)          | Agricultural soils and clay                | 6.7 (1.9-18) for As(V)                                         |
|                       | Sullivan and Aller (1996; Geochim Cosmochim Acta) | Sediment from Amazon Shelf                 | 11~5000                                                        |
|                       | Manning and Goldberg (1997, Soil Sci)             | Californian soils                          | 5~521 for As(III), 10~80 for As(V)                             |
|                       | DPHE/BGS/MML (1999)                               | Bangladesh sediment                        | ~1 under high P-low Fe<br>> 200 under low P-high Fe conditions |
|                       | BGS & DPHE (2001)                                 | Bangladesh sediment                        | 2~6                                                            |
|                       | van geen et al (2008, Environ Sci Technol)        | Bangladesh sediment                        | ~4                                                             |
| Laboratory experiment | Kuhlmeier (1997, J of Soil Contam)                | Highly contaminated clayey and sandy soils | 0.26~3.3                                                       |
|                       | Williams et al (2003, J of Environ Qual)          | Soils from the Melton Brach watershed      | 345                                                            |

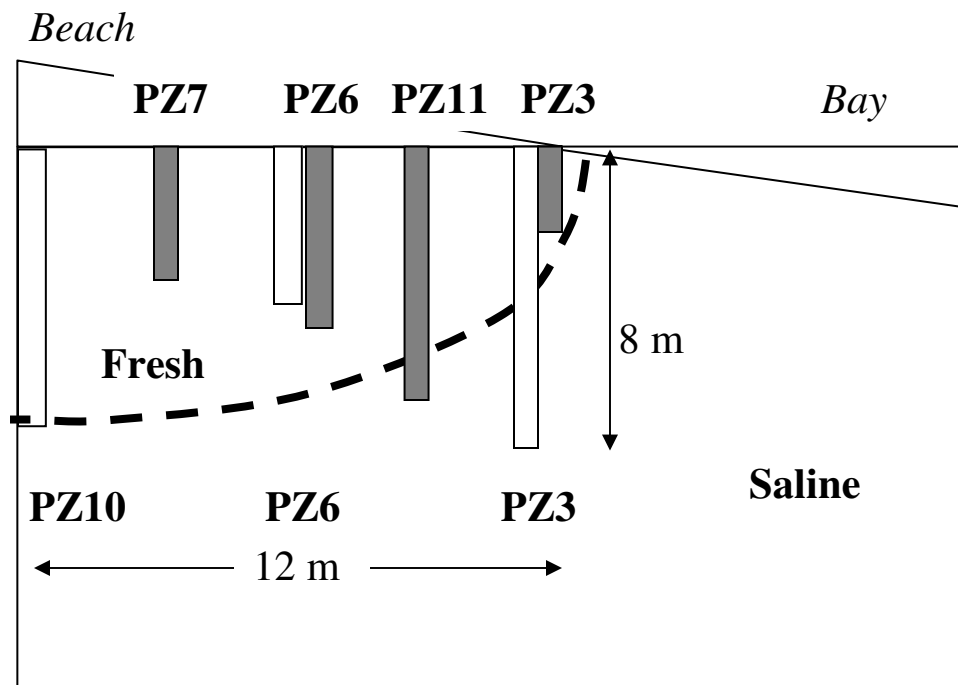

**Figure S1.** Location of pore water (white bar) and sediment core (gray bar) transect.



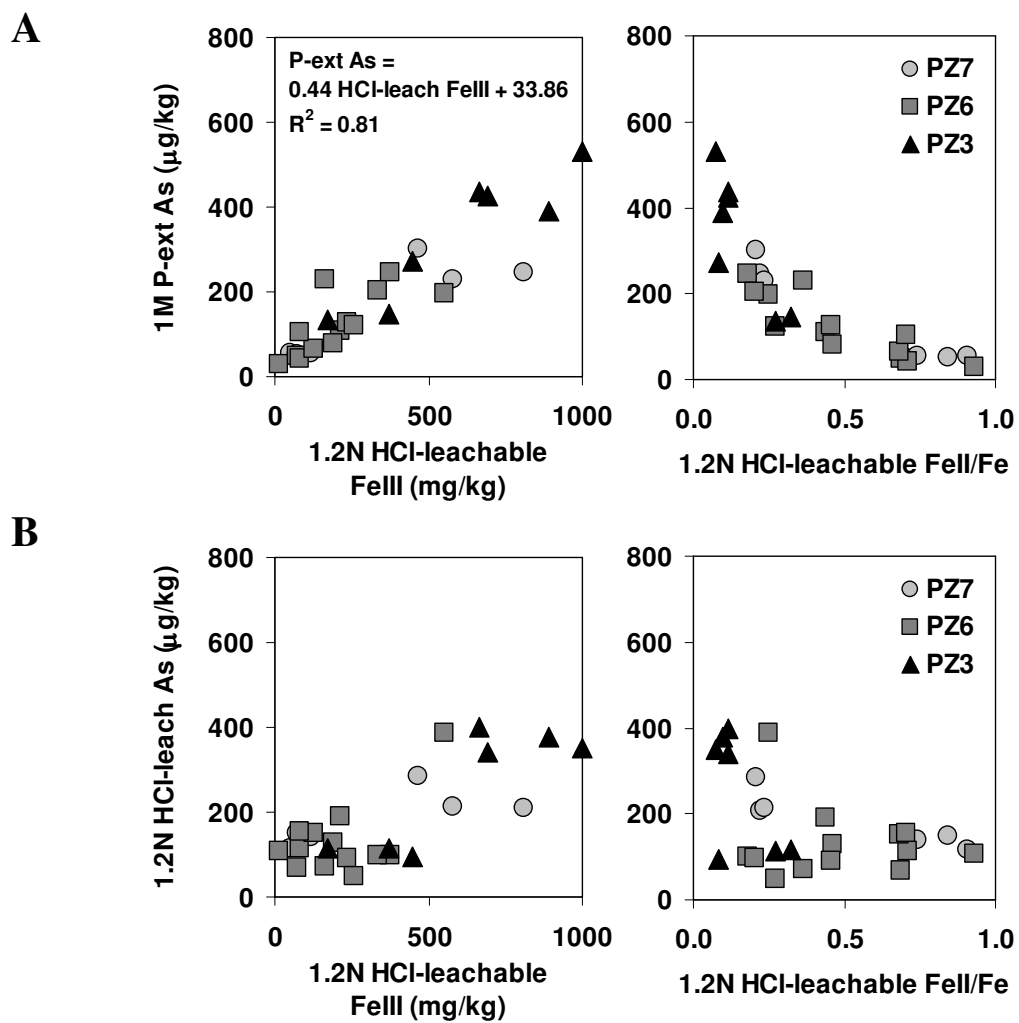

**Figure S2.** A. Correlation between 1M P-extractable As and sedimentary Fe(III) or Fe(II)/Fe; B. Correlation between 1.2N HCl-leachable As and sedimentary Fe(III) or Fe(II)/Fe.

Injection well

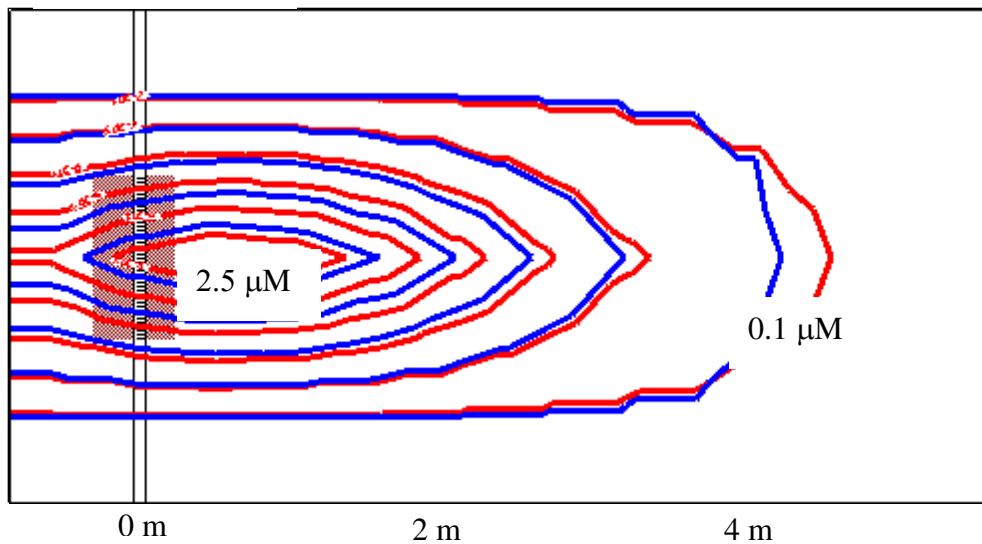

|                             |                                    |          |
|-----------------------------|------------------------------------|----------|
| <b>Hydraulic properties</b> | Hydraulic Cond (K <sub>x,y</sub> ) | 86.4 m/d |
|                             | hydraulic gradient                 | 0.0015   |
|                             | Effective porosity                 | 0.39     |
| <b>Initial GW chemistry</b> | Fell                               | 20 µM    |
|                             | DO                                 | 0 µM     |
|                             | pH                                 | 6.5      |
| <b>Injection well</b>       | period                             | 4 weeks  |
|                             | AsV                                | 6.7 µM   |
|                             | AsIII                              | 0        |
|                             | NO <sub>3</sub>                    | 100 µM   |
|                             | DO                                 | 20 µM    |
|                             | Fell                               | 0 µM     |
| <b>Sewage plume</b>         | Fell                               | 500 µM   |
|                             | pH                                 | 6.5      |
|                             | AsIII                              | 0.15 µM  |
|                             | AsV                                | 0.02     |
|                             | DO                                 | 0 µM     |
|                             | NO <sub>3</sub>                    | 0 µM     |

**Figure S3.** PHT3D simulation result for As(III) (red) and As(V) (blue) plumes in 100 days after starting of As (V) injection by applying K<sub>d</sub> of 4 L/kg, which is based on Höhn et al (2006)' s As(V) injection experiment. The table summarizes the hydraulic properties and chemistry of groundwater applied for PHT3D modeling.

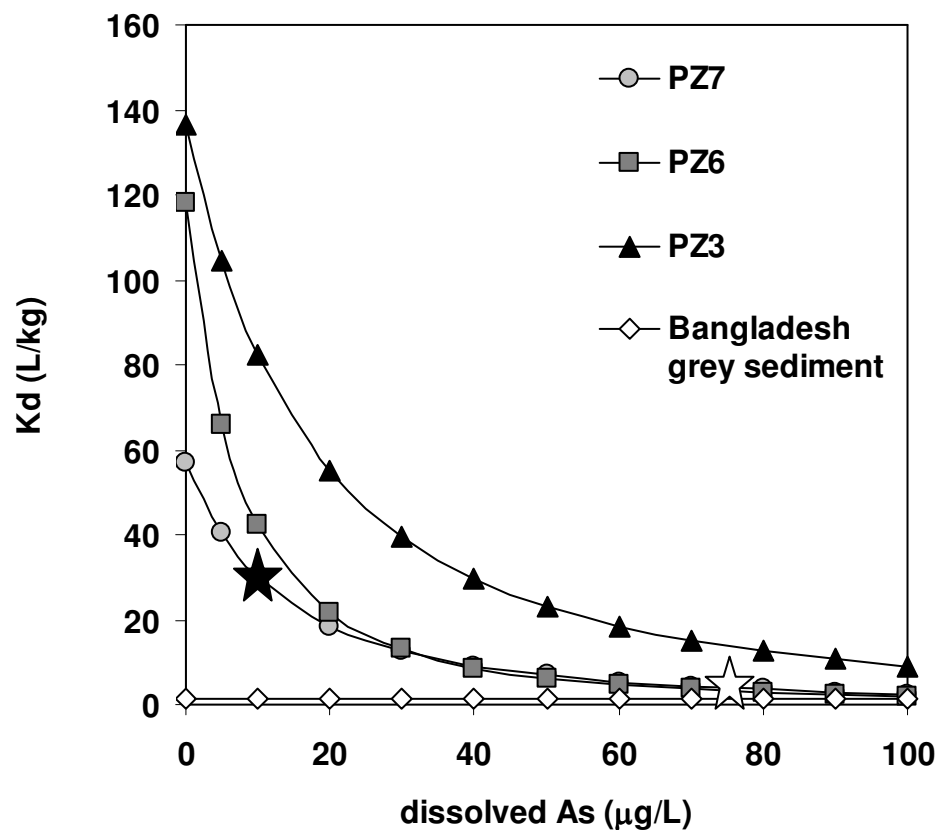

**Figure S4.** Variation of distribution coefficient ( $K_d$ ) as a function of dissolved As at equilibrium for sediments from PZ7, PZ6, and PZ3. Solid star represents our study area, which corresponds to dissolved As of  $10 \mu\text{g/L}$  and  $K_d$  of  $30 \text{ L/kg}$ , while open star represents Höhn et al (2006)'s As(V) injection experiment, in which dissolved As concentration in the plume was on average  $\sim 75 \mu\text{g/L}$ , resulting in  $K_d$  of  $4 \text{ L/kg}$ . Line with diamond symbols represents grey sediment from Bangladesh aquifer, which has  $K_{La}$  of  $0.00038 \text{ L}/\mu\text{g}$  and As sorption capacity of  $3380 \mu\text{g/kg}$  (Jung, unpublished).
